# Supplementary material for: A novel and fast method to prepare a Cu-supported α-Sb2S3@CuSbS2binder-free electrode for sodium-ion batteries
Source: Royal Society of Chemistry journal article supplement (doi:10.1039/d0ra05623e), 2020-01-01
Supplement: d0ra05623e1.pdf [file d0ra05623e1.pdf]

Supporting Information for A novel and fast method to prepare  
Cu-supported  $\alpha$ -Sb<sub>2</sub>S<sub>3</sub>@CuSbS<sub>2</sub> binder-free electrode for  
sodium-ion batteries

Jing Zhou<sup>a</sup>, Qirui Dou<sup>a</sup>, Lijuan Zhang<sup>a</sup>, Yingyu Wang<sup>a</sup>, Hao Yuan<sup>a</sup>,

Jiangchun Chen<sup>a, b</sup>, Yu Cao<sup>\*, a</sup>

<sup>a</sup> School of Chemical Engineering, School of Electrical Engineering, Key Laboratory of Modern Power System Simulation and Control & Renewable Energy Technology, Ministry of Education, Northeast Electric Power University, Jilin 132012, China

<sup>b</sup> School of Chemistry, Beijing Advanced Innovation Center for Biomedical Engineering, Beihang University, Beijing 100191, China

**Table S1.** Formulations and corresponding active material loading of different kinds of electrodes.

| materials                                                 | load of the electrode       | Ratio of active material, conductive carbon and binder | mass of the active material   | Ref. |
|-----------------------------------------------------------|-----------------------------|--------------------------------------------------------|-------------------------------|------|
| Sb <sub>2</sub> S <sub>3</sub> Hollow Microspheres        | 1 mg cm <sup>-2</sup>       | 3:1:1                                                  | 0.6 mg cm <sup>-2</sup>       | 1    |
| Sb <sub>2</sub> S <sub>3</sub>                            | 1 mg cm <sup>-2</sup>       | 7:2:1                                                  | 0.7 mg cm <sup>-2</sup>       | 2    |
| Tin assisted Sb <sub>2</sub> S <sub>3</sub> Nanoparticles | 1.3 mg cm <sup>-2</sup>     | 7:2:1                                                  | 0.91 mg cm <sup>-2</sup>      | 3    |
| Sb <sub>2</sub> S <sub>3</sub> /Reduced Graphene Oxide    | 1 mg cm <sup>-2</sup>       | 7:2:1                                                  | 0.7 mg cm <sup>-2</sup>       | 4    |
| Sb <sub>2</sub> S <sub>3</sub> Nanosheets                 | 1 mg cm <sup>-2</sup>       | 6:2:2                                                  | 0.6 mg cm <sup>-2</sup>       | 5    |
| Sb <sub>2</sub> S <sub>3</sub> /N-doped carbon nanofiber  | 0.8 mg cm <sup>-2</sup>     | 8:1:1                                                  | 0.64 mg cm <sup>-2</sup>      | 6    |
| Sb <sub>2</sub> Se <sub>3</sub> @NC@rGO                   | 0.6-0.8 mg cm <sup>-2</sup> | 8:1:1                                                  | 0.48-0.64 mg cm <sup>-2</sup> | 7    |
| Our work                                                  | 0.4-0.6 mg cm <sup>-2</sup> |                                                        | 0.4-0.6 mg cm <sup>-2</sup>   |      |

**Table S2.** Preparation time of different types of electrodes.

| Materials                                       | Time required for electrode preparation | Ref. |
|-------------------------------------------------|-----------------------------------------|------|
| $\text{Sb}_2\text{S}_3/\text{rGO}$              | 16 h                                    | 4    |
| $\text{SnS}_2/\text{Sb}_2\text{S}_3@\text{rGO}$ | overnight                               | 8    |
| $\text{Zn}_4\text{Sb}_3$                        | overnight                               | 9    |
| Sb porous hollow microspheres                   | 12 h                                    | 10   |
| $\text{Sb}_2\text{S}_3/\text{SGS}$              | 12 h                                    | 11   |
| $\text{Sb}_2\text{S}_3@\text{P/C}$              | overnight                               | 12   |
| Amorphous $\text{Sb}_2\text{S}_3$ Nanospheres   | 12 h                                    | 13   |
| Antimony Sulfide/Graphene                       | 12 h                                    | 14   |

## References

1. J. Xie, L. Liu, J. Xia, Y. Zhang, M. Li, Y. Ouyang, S. Nie and X. Wang, *Nano-micro letters*, 2018, **10**, 12.
2. S. Yao, J. Cui, Z. Lu, Z. L. Xu, L. Qin, J. Huang, Z. Sadighi, F. Ciucci and J. K. Kim, *Advanced Energy Materials*, 2017, **7**, 1602149.
3. P. Deng, J. Yang, W. He, S. Li, W. Zhou, D. Tang and B. Qu, *ChemElectroChem*, 2018, **5**, 811-816.
4. Z. Z. Pan, Y. Yan, N. Cui, J. C. Xie, Y. B. Zhang, W. S. Mu and C. Hao, *Advanced Materials Interfaces*, 2018, **5**, 1701481.
5. L. Yajie, T. Zhixin, Z. Jian, P. W. Kong, Z. Qing, F. Haifeng, K. Konstantin, G. Zaiping and L. H. Kun, *Nature Communications*, 2018, **9**, 3645.
6. H. Zhai, H. Jiang, Y. Qian, X. Cai, H. Liu, Y. Qiu, M. Jin, F. Xiu, X. Liu and L. Lai, *Materials Chemistry and Physics*, 2020, **240**, 122139.
7. S. Wang, P. Xiong, X. Guo, J. Zhang, X. Gao, F. Zhang, X. Tang, P. H. Notten and G. Wang, *Advanced Functional Materials*, 2020, 2001588.
8. S. Wang, S. Liu, X. Li, C. Li, R. Zang, Z. Man, Y. Wu, P. Li and G. Wang, *Chemistry—A European Journal*, 2018, **24**, 3873-3881.
9. A. Nie, L. y. Gan, Y. Cheng, X. Tao, Y. Yuan, S. Sharifi-Asl, K. He, H. Asayesh-Ardakani, V. Vasiraju and J. Lu, *Advanced Functional Materials*, 2016, **26**, 543-552.
10. H. Hou, M. Jing, Y. Yang, Y. Zhang, Y. Zhu, W. Song, X. Yang and X. Ji, *Journal of Materials Chemistry A*, 2015, **3**, 2971-2977.
11. X. Xiong, G. Wang, Y. Lin, Y. Wang, X. Ou, F. Zheng, C. Yang, J.-H. Wang and M. Liu, *ACS nano*, 2016, **10**, 10953-10959.
12. J.-H. Choi, C.-W. Ha, H.-Y. Choi, H.-C. Shin, C.-M. Park, Y.-N. Jo and S.-M. Lee, *Electrochimica Acta*, 2016, **210**, 588-595.
13. M. Li, F. Huang, J. Pan, L. Li, Y. Zhang, Q. Yao, H. Zhou and J. Deng, *Nanomaterials*, 2019, **9**, 1323.
14. C.-Y. Li, J. Patra, C.-H. Yang, C.-M. Tseng, S. B. Majumder, Q.-F. Dong and J.-K. Chang, *ACS Sustainable Chemistry & Engineering*, 2017, **5**, 8269-8276.
